# Supplementary material for: Spatiotemporal Distribution of Tuberculosis in the Oromia Region of Ethiopia: A Hotspot Analysis
Source: MDPI journal article supplement (doi:10.3390/tropicalmed8090437), 2023-09-07
Supplement: s1 [file s1]

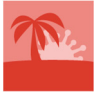

# Supplementary Materials: Spatiotemporal distribution of tuberculosis in the Oromia re-gion of Ethiopia: Hotspot analysis

Dereje Bekele<sup>1,2</sup>, Solomon Aragie<sup>2</sup>, Kefyalew Addis Alene<sup>3</sup>, Tariku Dejene<sup>4</sup>, Samson Warkaye<sup>5</sup>, Melat Mezemir<sup>6</sup>, Dereje Abdena<sup>1</sup>, Tesfaye Kebebew<sup>7</sup>, Abera Botore<sup>7</sup>, Geremew Mekonen<sup>1</sup>, Gadissa Gutema<sup>2,8</sup>, Boja Dufera<sup>2,9</sup>, Kolato Gemedel<sup>1</sup>, Birhanu Kenate<sup>7</sup>, Dabesa Gobena<sup>7</sup>, Bizuneh Alemu<sup>1</sup>, Dagnachew Hailemariam<sup>1</sup>, Daba Muleta<sup>7</sup>, Gilman SIU<sup>10</sup>, Ketema Tafess<sup>11,12</sup>

**Table S1.** Variance inflation factors.

| Variables                      | VIF   |
|--------------------------------|-------|
| HIV Positivity Rate            | 1.095 |
| Population density             | 1.210 |
| Laboratory diagnostic coverage | 1.216 |
| Health Service coverage        | 1.069 |
| Precipitation                  | 5.269 |
| Temperature                    | 3.492 |
| Wind Speed                     | 2.034 |
| Year                           | 1.001 |
| Humidity                       | 8.978 |

\* Variables with VIF greater than six and above were excluded from the model.

**Table S2.** Univariate model for notification of TB in the Oromia region of Ethiopia, 2018–2022.

| Independent variables in univariate Poisson regression* | TB Notification |         |
|---------------------------------------------------------|-----------------|---------|
|                                                         | Coefficient     | P-value |
| HIV Positivity Rate                                     | 0.075896        | < 0.001 |
| Population density                                      | 0.312771        | < 0.001 |
| Laboratory diagnostic coverage                          | 0.056826        | < 0.001 |
| Health Service coverage                                 | 0.414084        | < 0.001 |
| Precipitation                                           | -0.026815       | < 0.001 |
| Humidity                                                | 0.023932        | < 0.001 |
| Temperature                                             | 0.068449        | < 0.001 |
| Wind Speed                                              | 0.090209        | < 0.001 |
| Year                                                    | -0.033156       | < 0.001 |

\* For all univariate models, “year” was considered as a control variable.

**Table S3.** Yearly and Quarterly (Seasonal) Notified TB Cases by Sex.

| <b>Year</b>     | <b>Quarter/Season</b> | <b>Male</b> | <b>Female</b> | <b>Total TB Case</b> |
|-----------------|-----------------------|-------------|---------------|----------------------|
| 2018            | January - March       | 5,040       | 4,437         | 9,477                |
|                 | April - June          | 5,174       | 4,266         | 9,440                |
|                 | July - September      | 5,381       | 4,285         | 9,666                |
|                 | October - December    | 5,785       | 4,873         | 10,658               |
| 2019            | January - March       | 5,819       | 4,467         | 10,286               |
|                 | April - June          | 5,845       | 4,610         | 10,455               |
|                 | July - September      | 5,704       | 4,332         | 10,036               |
|                 | October - December    | 5,884       | 4,874         | 10,758               |
| 2020            | January - March       | 5,851       | 4,959         | 10,810               |
|                 | April - June          | 4,433       | 3,565         | 7,998                |
|                 | July - September      | 5,150       | 4,099         | 9,249                |
|                 | October - December    | 6,035       | 4,908         | 10,943               |
| 2021            | January - March       | 5,907       | 4,761         | 10,668               |
|                 | April - June          | 5,937       | 4,705         | 10,642               |
|                 | July - September      | 6,132       | 4,825         | 10,957               |
|                 | October - December    | 6,348       | 5,050         | 11,398               |
| 2022            | January - March       | 6,856       | 5,592         | 12,448               |
|                 | April - June          | 6,918       | 5,409         | 12,327               |
|                 | July - September      | 5,285       | 4,013         | 9,298                |
|                 | October - December    | 4,974       | 3,790         | 8,764                |
| 2018 to<br>2022 | January - March       | 28,307      | 22,555        | 50,862               |
|                 | April - June          | 29,473      | 24,216        | 53,689               |
|                 | July - September      | 27,652      | 21,554        | 49,206               |
|                 | October - December    | 29,026      | 23,495        | 52,521               |

**Table S4.** The incidence rate of tuberculosis in the Oromia region at the zone level, between 2018 and 2022.

| Zone/Town            | TB incidence rate per 100,000 population |        |        |        |        | Total   |
|----------------------|------------------------------------------|--------|--------|--------|--------|---------|
|                      | 2018                                     | 2019   | 2020   | 2021   | 2022   |         |
| Adama Town           | 103.64                                   | 141.59 | 96.88  | 111.72 | 135.48 | 589.31  |
| Ambo Town            | 124.83                                   | 175.27 | 114.06 | 149.61 | 207.53 | 771.30  |
| Arsi                 | 103.05                                   | 96.88  | 83.13  | 88.61  | 92.67  | 464.33  |
| Asela Town           | 126.77                                   | 132.98 | 119.30 | 96.89  | 160.63 | 636.57  |
| Bale                 | 124.30                                   | 119.79 | 97.85  | 111.67 | 110.50 | 564.11  |
| Batu Town            | 167.55                                   | 136.45 | 105.24 | 97.65  | 159.44 | 666.33  |
| Bishan Guracha Town  | 214.02                                   | 70.96  | 46.61  | 55.05  | 89.17  | 475.82  |
| Bishoftu Town        | 108.79                                   | 104.99 | 87.30  | 96.20  | 106.24 | 503.52  |
| Borena               | 119.45                                   | 153.22 | 136.64 | 214.53 | 225.63 | 849.46  |
| Buno Bedele          | 79.10                                    | 87.21  | 97.85  | 87.96  | 73.27  | 425.39  |
| Burayu Town          | 146.45                                   | 133.27 | 99.00  | 118.57 | 153.36 | 650.64  |
| Dukem Town           | 262.82                                   | 497.30 | 470.39 | 424.94 | 414.25 | 2069.70 |
| East Bale            | 114.16                                   | 117.85 | 119.53 | 143.19 | 153.28 | 648.01  |
| East Harerge         | 102.40                                   | 113.20 | 103.44 | 122.33 | 119.30 | 560.67  |
| East Shewa           | 104.21                                   | 102.71 | 92.77  | 93.78  | 83.63  | 477.10  |
| East Wollega         | 79.15                                    | 82.17  | 76.07  | 59.95  | 43.47  | 340.80  |
| Finfinne Surrounding | 99.61                                    | 107.49 | 82.92  | 84.11  | 89.44  | 463.56  |
| Gelan Town           | 72.92                                    | 146.34 | 85.50  | 64.48  | 95.65  | 464.88  |
| Guji                 | 187.75                                   | 195.93 | 182.90 | 202.91 | 226.38 | 995.87  |
| Holeta Town          | 112.74                                   | 150.18 | 103.87 | 105.80 | 167.95 | 640.54  |
| Horo Guduru Wollega  | 66.02                                    | 75.14  | 65.02  | 55.29  | 43.25  | 304.71  |
| Ilubabor             | 79.43                                    | 92.91  | 95.95  | 88.81  | 59.77  | 416.86  |
| Jimma                | 77.41                                    | 85.08  | 84.50  | 84.64  | 73.61  | 405.24  |
| Jimma Town           | 149.06                                   | 181.26 | 145.68 | 179.01 | 194.90 | 849.91  |
| Kelem Wollega        | 117.11                                   | 106.34 | 98.58  | 96.64  | 74.40  | 493.07  |
| Lege Tafo Town       | 215.25                                   | 211.00 | 177.21 | 190.34 | 174.92 | 968.71  |
| Mojo Town            | 186.49                                   | 148.89 | 112.40 | 120.21 | 171.60 | 739.59  |
| Nekemte Town         | 123.90                                   | 121.26 | 73.86  | 88.08  | 115.47 | 522.57  |
| North Shewa          | 72.03                                    | 72.25  | 51.52  | 60.54  | 51.84  | 308.19  |
| Robe Town            | 109.80                                   | 108.02 | 107.48 | 75.25  | 138.62 | 539.17  |
| Sebeta Town          | 73.16                                    | 77.25  | 62.91  | 52.84  | 73.48  | 339.64  |
| Shashemene Town      | 292.28                                   | 261.33 | 263.12 | 241.29 | 305.71 | 1363.74 |
| South West Shewa     | 95.21                                    | 99.16  | 89.17  | 93.84  | 70.33  | 447.71  |
| Sululta Town         | 269.18                                   | 224.67 | 158.14 | 262.18 | 284.76 | 1198.93 |
| Weliso Town          | 122.22                                   | 208.38 | 192.60 | 129.41 | 133.76 | 786.37  |
| West Arsi            | 107.77                                   | 101.71 | 86.38  | 97.58  | 89.26  | 482.70  |
| West Guji            | 165.71                                   | 179.59 | 196.60 | 234.11 | 201.39 | 977.40  |
| West Harerge         | 100.82                                   | 94.02  | 106.29 | 128.46 | 143.39 | 572.99  |
| West Shewa           | 77.73                                    | 81.06  | 73.16  | 69.60  | 52.45  | 353.99  |
| West Wollega         | 89.29                                    | 91.04  | 75.35  | 78.03  | 54.11  | 387.83  |
| Oromia               | 103.21                                   | 106.19 | 96.93  | 105.49 | 100.49 | 512.13  |
